# Supplementary material
Source: PubMed Central journal article supplement (PMC4121806)

## **Supporting Information**

### **Materials and Methods**

#### **Cell culture**

HCT116, p53KO, p21KO, and p21/PUMA DKO cells were a kind gift of Bert Vogelstein (Johns Hopkins Medical School). RKO, ACHN, LOX IMVI, UACC62, CAKI, NCI H460, DLD1, SW480, A375.S2 and U2OS cells were obtained from National Cancer Institute as part of the NCI 60 panel of cancer cell lines and from American Type Culture Collection (ATCC). The *p21* expression vector was a kind gift of William G. Kaelin (Dana Farber Cancer Institute). Cell lines were grown as recommended. *TERT* shRNAs were a kind gift of William Hahn (Harvard University). Lentiviral shRNA expression vectors were obtained from OpenBiosystems and were packaged by co-transfecting with lentiviral packaging plasmids into 293T cells using Effectene (Qiagen). After infection with lentivirus shRNA particles, cells stably transduced with lentiviral DNA were selected in medium containing puromycin. Cells were treated with 2.5  $\mu$ M imetelstat or mismatch oligonucleotides (Geron Corporation) twice per week for up to 6 weeks and did not exceed 80% confluence during the treatment. Cells were treated with indicated concentrations of UC2288 at 80% confluence during the treatment. Cells were treated with indicated concentrations of CP-31398 at 80% confluence during the treatment.

#### **Cell viability and colony formation assay**

For viability assays, cells were mixed with an equal volume of Trypan Blue Solution (Invitrogen) and counted using Countess (Invitrogen). For colony formation assays,  $10^3$  cells were seeded in triplicate. Colonies were stained with 0.005% crystal-violet solution and counted after 10 days.

## **Nanoparticle Synthesis**

PLGA nanoparticles loaded with siRNA were fabricated using a double emulsion solvent evaporation method and coated with ANTP as previously described (37). After washing unencapsulated siRNA and unattached ANTP, nanoparticles were lyophilized with the cryoprotectant, trehalose, at an equal mass ratio of polymer to carbohydrate.

## **Tumorigenesis assays**

Eight-week old, athymic nude (NCR nu/nu) mice (n=5) were injected subcutaneously with cancer cells ( $2.5 \times 10^6$ ). After one week, tumor-bearing mice received mismatch oligonucleotide or imetelstat (30 mg/kg bodyweight) three times per week by intraperitoneal injection. Sorafenib was dissolved in Cremophor EL/95% ethanol (50:50) (Sigma) as a 4X stock solution and diluted with sterile water before use. Sorafenib (15 mg/kg) was administered by oral gavage three times per week. UC2888 was dissolved in Oleic acid with PEG400 as a 4X stock solution. UC2288 (15mg/kg body weight) was administered by oral gavage three times per week. For experiments using nanoparticles mice were injected with p21 or non-specific siRNA (1.0 mg/Kg body) two times a week. CP-31398 was administered at the concentration of 25 mg/kg everyday. Tumor growth was measured using calipers, and tumor volumes were calculated using the formula  $0.5 \times \text{length} \times \text{width}^2$ . TUNEL assays were performed as described previously (1). For body weight measurements, mice were weighed at the end of the experiments before sacrifice. Blood was collected from the tail vein for alkaline aminotransferase (ALT), aspartate aminotransferase (AST) and alkaline phosphatase (AP) activity analysis. ALT, AST and AP activities were measured using kits from Sigma-Aldrich. For complete blood analyses we did the following

experiments: Hematocrit (Packed red cell volume) was analyzed and calculated as percentage of packed cell volume to the total volume. For RBC count 10  $\mu$ l whole blood was diluted 1:1000 with PBS and RBC were counted using hemocytometer. For white blood cell count, we mixed 10  $\mu$ l whole blood with RBC lysis reagent and after 1 minute of incubation the white cells were counted by hemocytometer. For measuring kidney function and as an indicator of glomerular filtration rate Serum creatinine levels were measured using Creatinine assay kit as per the manufacturers recommendations (Abcam).

### **Quantitative RT-PCR analysis**

Total RNA was extracted with TRIzol (Invitrogen) and purified using RNAeasy mini columns (Qiagen). First-strand cDNA was generated using ProtoScript M-MuLV First-Strand cDNA Synthesis Kit (New England Biolabs), and quantitative PCR was performed using Power SYBR Green PCR Master Mix (Applied Biosystems). *p21*, *PUMA*, *BAX*, *BAK*, *TERT*, *MDC1*, *NBS1*, *CDKN1B* (*p27*) and *E2F1* expression were analyzed using primers listed in Table S3. *Actin* mRNA was measured as an internal control.

### **Immunoblot analysis**

Cell lysates were prepared using Pierce IP Lysis Buffer (Thermo Scientific) containing Protease Inhibitor Cocktail (Roche) and Phosphatase Inhibitor Cocktail (Sigma-Aldrich, St. Louis, MO). Protein concentration was estimated using a Bradford Protein Assay kit (Bio-Rad Laboratories). Proteins were separated on 10% or 12% polyacrylamide gels and transferred to PVDF membranes using a Bio-Rad Trans-Blot wet transfer apparatus. Membranes were blocked with 5% nonfat milk and probed with primary antibodies followed by the appropriate secondary HRP-

conjugated antibody (GE healthcare, UK). Blots were developed using the SuperSignal West Pico Chemiluminescent Substrate (Pierce). Antibody information is provided in Table S3.

### **FACS and Annexin V-FITC staining**

FACS analyses for sub G1 cell population were done as described previously (2). Briefly cells were fixed with 70% ethanol for overnight. The following day, cells were washed twice with 1X PBS and resuspended in 300  $\mu$ l of 1X PBS, treated with RNAase (Sigma-Aldrich) and Propidium iodide for 1 hr and analyzed using FACSCaliber (BD Biosciences). Annexin V-FITC/PE staining were performed as described previously (3) using a kit available from BD Bioscience, stained cells were analyzed using FACSCaliber (BD Biosciences).

### **TRAP assay**

The TRAP assay was performed essentially as described (4). Briefly, cells were washed once with ice cold PBS, resuspended in 100 $\mu$ L of ice-cold CHAPS lysis buffer (10 mM Tris-HCl (pH 7.5), 1 mM MgCl<sub>2</sub>, 1 mM EGTA, 0.5% CHAPS, 10% glycerol and 5 mM beta-mercaptoethanol) and incubated 25 min on ice to lyse. Lysates were centrifuged for 20 min at 13,000 rpm at 4°C, supernatants were collected, and protein concentrations were measured using a Bradford Protein Assay Kit (Bio-Rad Laboratories). For the preparation of lysates equal weight tumor tissue was homogenized and processed similar to as described above. Telomerase activity was measured using a SYBR Green RQ-TRAP assay with 750 ng lysate, 0.1  $\mu$ g telomerase primer TS and 0.05  $\mu$ g anchored return primer ACX in a 25  $\mu$ l reaction volume with SYBR Green PCR Master Mix (Applied Biosystems). TS and ACX primer sequences are provided in Table S3. Samples were analyzed using a CFX96 thermal cycler (Bio-Rad laboratories) by incubating for 20 minutes at

25°C, and amplified in a 35 cycle, two-step PCR with the conditions: 30 seconds at 95°C, and 90 seconds at 60°C. The threshold cycle values (Ct) were determined from semi-log amplification plots (log increase in fluorescence versus cycle number). Every plate included standards, inactivated samples and lysis buffer as controls. Each sample was analyzed at least in triplicate. Telomerase activity was plotted relative to untreated cells.

### **Telomere PNA FISH analysis**

Peptide Nucleic Acid Fluorescence In Situ Hybridization (PNA FISH) was performed as described (5). Briefly, cells were treated with 0.5 µg/ml of colcemid for 3.5 hrs to arrest cells in metaphase. Trypsinized cells were incubated in 0.6 M KCl, fixed with methanol:acetic acid (3:1) and spread on glass slides. Metaphase chromosome spreads were hybridized with the telomeric PNA probe, 5'-Tam-OO-(CCCTAA)<sub>4</sub>-3'. Chromosome images and telomere signals were captured and processed using a Nikon Eclipse 80i microscope and NIS-elements BR 3.1 software. At least 1000 chromosomes per sample were scored for telomere loss (i.e., signal free ends).

### **Terminal Restriction Fragment (TRF) analysis**

Terminal Restriction Fragment (TRF) southern blot analysis was performed as described (6). Briefly, cells were trypsinized and embedded in 1% agarose plugs (2x10<sup>6</sup> cells per plug). Plugs were incubated in proteinase K digestion buffer (500 mM EDTA pH 8.0, 2% N-laurylsarcosine, and 20 mg/ml proteinase K) at 56°C overnight. Plugs were washed with TE buffer for several hrs and then digested with RsaI and HinfI endonucleases at 37°C overnight. Plugs were loaded into 1% agarose gels for pulsed-field gel electrophoresis. After electrophoresis, gels were dried, and soaked in denaturing solution (0.2 N NaOH, 0.6 M NaCl) for 1 hr to denature DNA, followed by

neutralizing solution (1.5M NaCl, 0.5M Tris-Cl pH 7.4) for 1 hr. To detect telomere fragments, in-gel hybridization was performed using  $\gamma$ - $^{32}\text{P}$ -(CCCTAAA)<sub>4</sub> oligonucleotide probe, gels were washed and exposed to a PhosphorImager screen. Telomere hybridization signals were scanned using a Typhoon PhosphorImager and quantified using ImageQuant software (GE).

### **ALT activity assay by monitoring C-Circle amplification**

Rolling Circle Amplification (RCA) of C-circle DNA was performed as described (26), using  $2 \times 10^5$  cells per sample. The RCA reaction was carried out in 20 $\mu$ l reaction using 200 ng of DNA and from each samples (1/10<sup>th</sup>) of the reaction was spotted to a Biodyne B membrane (Pall Corporation). Membranes were UV irradiated to crosslink DNA and pre-hybridized using PerfectHyb Plus hybridization buffer (Sigma-Aldrich) at 37°C for 1 hr. Membranes were hybridized with a  $\gamma$ - $^{32}\text{P}$ -labelled (CCCTAA)<sub>3</sub> probe. The hybridized membrane was autoradiographed at -80°C for 1 day and developed to detect C-circle amplification products.

### **Statistical Analysis**

All the experiments were performed at least three times in triplicates, and the data are expressed as Mean  $\pm$  Standard Error Mean (SEM). Area Under the Curve (AUC) values were calculated using GraphPad Prism version 6.02 for Macintosh, GraphPad Software, San Diego California USA ([www.graphpad.com](http://www.graphpad.com)). Student's t-test for two-tailed distribution with unequal variance was performed in Microsoft Excel to derive the p-values.

For synergy analyses, we used R, a system for statistical computation and graphics (49), we assessed whether the combined effects from two drugs were additive (responses were equal to the sum of the single-drug effects), synergistic (greater than the sum of the single-drug effects)

or antagonistic (less than the sum of the single-drug effects) on tumor growth in a given cancer cell lines. Two-way analysis of variance (ANOVA) was used to test for the main effects of the drugs and their interaction on tumor size at the end point data for each all cell lines. Bonferroni correction was performed to counteract the problem of multiple comparisons (7). To determine whether various drug combinations exerted additive, synergistic or antagonistic impacts on decreasing tumor size, we compared the difference between observed effects with the expected additive effects for the mouse treated with both drugs (7). The difference was estimated as the interaction coefficient in the ANOVA. If there is a significant positive difference (i.e., interaction coefficient  $> 0$  and Bonferroni adjusted p-value  $< 0.01$ ), then the impact from the combined drugs was classified as antagonism. If there is a significant negative difference (i.e., interaction coefficient  $< 0$  and Bonferroni adjusted p-value  $< 0.01$ ), then the impact from the combined drugs was classified as synergistic on decreasing tumor size. If there is no significant difference, then the impact from the combined drugs was classified as additive.

## Supplementary Materials and Methods references

1. Palakurthy RK, *et al.* (2009) Epigenetic silencing of the RASSF1A tumor suppressor gene through HOXB3-mediated induction of DNMT3B expression. (Translated from eng) *Mol Cell* 36(2):219-230 (in eng).
2. Santra MK, Wajapeyee N, & Green MR (2009) F-box protein FBXO31 mediates cyclin D1 degradation to induce G1 arrest after DNA damage. (Translated from eng) *Nature* 459(7247):722-725 (in eng).
3. Wajapeyee N, Serra RW, Zhu X, Mahalingam M, & Green MR (2008) Oncogenic BRAF induces senescence and apoptosis through pathways mediated by the secreted protein IGFBP7. (Translated from eng) *Cell* 132(3):363-374 (in eng).
4. Wege H, Chui MS, Le HT, Tran JM, & Zern MA (2003) SYBR Green real-time telomeric repeat amplification protocol for the rapid quantification of telomerase activity. (Translated from eng) *Nucleic Acids Res* 31(2):E3-3 (in eng).
5. Wu L, *et al.* (2006) Pot1 deficiency initiates DNA damage checkpoint activation and aberrant homologous recombination at telomeres. (Translated from eng) *Cell* 126(1):49-62 (in eng).
6. Blasco MA, *et al.* (1997) Telomere shortening and tumor formation by mouse cells lacking telomerase RNA. (Translated from eng) *Cell* 91(1):25-34 (in eng).
7. Slinker BK (1998) The statistics of synergism. (Translated from eng) *J Mol Cell Cardiol* 30(4):723-731 (in eng).



**Table S1. p16 status of the telomerase positive cancer cell lines used in this study.**

| <b>Cell line</b> | <b>Alteration in p16</b>                                  |
|------------------|-----------------------------------------------------------|
| ACHN             | Homozygous deletion                                       |
| CAKI             | Homozygous deletion                                       |
| HCT116           | Point mutation (Premature termination codon 80 (CGA-TGA)) |
| LOX IMVI         | Homozygous deletion                                       |
| NCI H460         | Homozygous deletion                                       |
| OVCAR5           | Homozygous deletion                                       |
| RKO              | DNA hypermethylation of the p16 promoter                  |
| UACC62           | Homozygous deletion                                       |

**Table S2. Results of statistical analyses to determine synergism, antagonism and additive effects among indicated siRNA and drug combinations.**

| Cell line      | Effect                                          | Coefficient   | p-Value         | Synergism/Antagonism/Additive | Bonferroni Adjusted p-value |
|----------------|-------------------------------------------------|---------------|-----------------|-------------------------------|-----------------------------|
| <b>HCT116</b>  | Nanoparticle encapsulated p21 siRNA main effect | 103.4         | .00144248       |                               | 1.88E-02                    |
|                | Imetelstat main effect                          | -118.6        | 9.4-E-08        |                               | 1.22E-06                    |
|                | <b>p21 siRNA: Imetelstat interaction</b>        | <b>-528.4</b> | <b>1.04E-05</b> | <b>Synergism</b>              | <b>1.35E-04</b>             |
| <b>ACHN</b>    | Nanoparticle encapsulated p21 siRNA main effect | 44            | 3.75E-22        |                               | 4.88E-21                    |
|                | Imetelstat main effect                          | -89           | 4.94E-26        |                               | 6.24E-25                    |
|                | <b>p21 siRNA: Imetelstat interaction</b>        | <b>-443</b>   | <b>1.09E-23</b> | <b>Synergism</b>              | <b>1.42E-22</b>             |
| <b>HCT116</b>  | Sorafenib main effect                           | -182          | 2.43E-22        |                               | 3.159E-21                   |
|                | Imetelstat main effect                          | -241          | 5.30E-24        |                               | 6.89E-23                    |
|                | <b>Sorafenib: Imetelstat interaction</b>        | <b>-72</b>    | <b>4.23E-10</b> | <b>Synergism</b>              | <b>5.499E-20</b>            |
| <b>RKO</b>     | Sorafenib main effect                           | -173          | 1.34E-33        |                               | 1.742E-21                   |
|                | Imetelstat main effect                          | -131          | 2.78E-21        |                               | 3.614E-20                   |
|                | <b>Sorafenib: Imetelstat interaction</b>        | <b>-139</b>   | <b>5.35E-14</b> | <b>Synergism</b>              | <b>6.955E-13</b>            |
| <b>ACHN</b>    | Sorafenib main effect                           | -120          | 8.49E-20        |                               | 1.1037E-18                  |
|                | Imetelstat main effect                          | -70           | 5.71E-18        |                               | 7.423E-17                   |
|                | <b>Sorafenib: Imetelstat interaction</b>        | <b>-190</b>   | <b>3.44E-14</b> | <b>Synergism</b>              | <b>4.472E-13</b>            |
| <b>LOXIMVI</b> | Sorafenib main effect                           | -80           | 2.17E-20        |                               | 2.82E-19                    |
|                | Imetelstat main effect                          | -202          | 9.92E-24        |                               | 1.29E-22                    |
|                | <b>Sorafenib: Imetelstat interaction</b>        | <b>-234</b>   | <b>8.54E-17</b> | <b>Synergism</b>              | <b>1.11E-15</b>             |
| <b>UACC62</b>  | Sorafenib main effect                           | -42           | 4.98E-19        |                               | 6.47E-18                    |
|                | Imetelstat main effect                          | -294          | 4.06E-25        |                               | 5.28E-24                    |
|                | <b>Sorafenib: Imetelstat interaction</b>        | <b>-274</b>   | <b>3.47E-17</b> | <b>Synergism</b>              | <b>4.51E-16</b>             |
| <b>CAKI</b>    | Sorafenib main effect                           | -30           | 2.70E-20        |                               | 3.15E-19                    |
|                | Imetelstat main effect                          | -205          | 3.74E-25        |                               | 4.86E-24                    |
|                | <b>Sorafenib: Imetelstat interaction</b>        | <b>-265</b>   | <b>1.12E-18</b> | <b>Synergism</b>              | <b>1.46E-17</b>             |
| <b>HCT116</b>  | UC2288 main effect                              | -90           | 1.18E-19        |                               | 1.53E-18                    |
|                | Imetelstat main effect                          | -295          | 3.57E-24        |                               | 4.641E-23                   |
|                | <b>UC2288: Imetelstat interaction</b>           | <b>-266</b>   | <b>4.27E-16</b> | <b>Synergism</b>              | <b>5.55E-15</b>             |
| <b>ACHN</b>    | UC2288 main effect                              | -18           | 1.01E-19        |                               | 1.313E-18                   |
|                | Imetelstat main effect                          | -128          | 7.56E-23        |                               | 9.828E-22                   |
|                | <b>UC2288:Imetelstat interaction</b>            | <b>-350</b>   | <b>4.78E-19</b> | <b>Synergism</b>              | <b>6.214E-18</b>            |

**Table S3. Primer sequences for RT-qPCR analysis; clone ID and catalog numbers for shRNAs (Open Biosystems); antibodies used; source and concentration of chemical inhibitors used.**

| <b>Application</b> | <b>Gene symbol</b>       | <b>Forward primer (5'-3')</b>  | <b>Reverse primer (5'-3')</b> |
|--------------------|--------------------------|--------------------------------|-------------------------------|
| RT-qPCR            | <i>CDKN1A (p21)</i>      | GCAGACCAGCATGACAGATTT          | GGATTAGGGCTTCCTCTTGGA         |
|                    | <i>PUMA</i>              | TCGGTGCTCCTTCACTCTGG           | GCAAACGAGCCCCACTCTCT          |
|                    | <i>BAX</i>               | ACCAAGGTGCCGGAAGTAT            | ACTCCCGCCACAAAGATGGT          |
|                    | <i>BAK</i>               | GCCCAGGACACAGAGGAGGT           | CCATGGTGCTGCTAGGTTGC          |
|                    | <i>ACTIN</i>             | GCATGGAGTCCTGTGGCATC           | TTCTGCATCCTGTCGGCAAT          |
|                    | <i>E2F1</i>              | TCCCTCCTGCAGTGTCTGAA           | CAGCGAGGAAGCTGACCTTT          |
|                    | <i>MDC1</i>              | GCCTTTTGACACGCACCTTG           | GCCCACCCTCTCTGCTGTTT          |
|                    | <i>NBS1</i>              | TGTCAGGACGGCAGGAAAGA           | TTCCCGGAGCAAAAAGAAA           |
|                    | <i>CDKN1B (p27)</i>      | GCTCCGGCTAACTCTGAGGA           | AAGAATCGTCGGTTGCAGGT          |
|                    | <i>TERT</i>              | GACACACATTCCACAGGTCG           | GACTCGACACCGTGTACCTAC         |
|                    | <i>ACX</i>               | GCGCGGCTTACCCTTACCCTTACCCTAACC |                               |
|                    | <i>TS</i>                | AATCCGTCGAGCAGAGTT             |                               |
|                    | <i>RCA</i>               | CCCTAACCTAACCTAA               |                               |
|                    |                          |                                |                               |
|                    | <b>Gene symbol</b>       | <b>Clone ID</b>                | <b>Catalog number</b>         |
| shRNAs             | <i>CDKN1A (p21)</i>      | TRCN0000040123                 | RHS3979-9607512               |
|                    |                          | TRCN0000040125                 | RHS3979-9607514               |
|                    | <i>MDC1</i>              | TRCN0000018850                 | RHS3979-9586172               |
|                    |                          | TRCN0000018851                 | RHS3979-9586173               |
|                    | <i>NBS1</i>              | TRCN0000040137                 | RHS3979-9607526               |
|                    |                          | TRCN0000010393                 | RHS3979-9630894               |
|                    | <i>E2F1</i>              | TRCN0000000251                 | RHS3979-9568611               |
|                    |                          | TRCN0000000253                 | RHS3979-9568613               |
|                    | <i>PUMA</i>              | TRCN0000033611                 | RHS3979-9601019               |
|                    | CDKN1B                   | TRCN0000039929                 | RHS3979-9607318               |
|                    |                          | TRCN0000009856                 | RHS3979-97079654              |
| siRNA              | <b>Gene symbol</b>       |                                | <b>Sequence</b>               |
|                    | CDKN1A (p21)             | Thermoscientific               | GCGAUGGAACUUCGACUUU           |
|                    | Non-targeting            | Thermoscientific               | UAAGGCUAUGAAGAGAUAC           |
|                    |                          |                                |                               |
|                    | <b>Protein symbol</b>    | <b>Antibody source</b>         |                               |
| Immunoblot/        | CDKN1A (p21)             | Santa Cruz Biotechnology, Inc. |                               |
| ChIP               | PUMA                     | Thermo Scientific              |                               |
|                    | BAX                      | Santa Cruz Biotechnology, Inc. |                               |
|                    | BAK                      | Santa Cruz Biotechnology, Inc. |                               |
|                    | TERT                     | R & D Systems                  |                               |
|                    | p53                      | Santa Cruz Biotechnology, Inc. |                               |
|                    | Cleaved caspase 3        | Cell signaling                 |                               |
|                    | Actin                    | Sigma-Aldrich                  |                               |
|                    |                          |                                |                               |
|                    | <b>Inhibitor</b>         | <b>Concentration</b>           | <b>Source</b>                 |
|                    | Imetelstat               | 2.5 $\mu$ M                    | Geron Corporation             |
|                    | Mismatch Oligonucleotide | 2.5 $\mu$ M                    | Geron Corporation             |

|  |           |                                      |                 |
|--|-----------|--------------------------------------|-----------------|
|  | Sorafenib | 1 $\mu$ M and 2.5 $\mu$ M            | LC Laboratories |
|  | UC2288    | 1 $\mu$ M, 2.5 $\mu$ M and 5 $\mu$ M |                 |
|  | CP-31398  | 2 and 5 $\mu$ g/ml                   | Sigma-Aldrich   |

### Supplementary figure legends

**Fig. S1. shRNA-mediated inhibition of *TERT* expression leads to potent growth inhibition in HCT116 p21KO cells.** Analysis of HCT116 p21KO (*A–D*) or wild-type (*E–H*) cells stably transduced with non-specific control (NS) or two different *TERT* shRNAs. (*A, E*) qRT-PCR analysis of *TERT* mRNA. (*B, F*) Cell viability as measured by trypan blue exclusion assay. Cell viability relative to non-specific shRNA is plotted. (*C, G*) Annexin V-FITC positive cells were quantified by FACS analysis. % Annexin V-FITC positive cells are plotted. (*D, H*) Telomerase activity as measured by the TRAP assay and plotted relative to the mismatch oligonucleotide. \*\*\* represents  $p < 0.0001$ .

**Fig. S2. shRNA-mediated loss of *p21* leads to apoptosis induction upon telomerase inhibition.** Analysis of HCT116 cells stably transduced with non-specific control (NS) or two different *p21* shRNAs. (*A*) Immunoblot analysis of p21 protein. (*B*) qRT-PCR analysis of *p21* mRNA. (*C–F*) Cells were treated with mismatch oligonucleotide or with imetelstat for 6 weeks. (*C*) Colony formation monitored by crystal violet staining. (*D*) Cell viability as measured by trypan blue exclusion assay. Cell viability relative to mismatch oligonucleotide is plotted. (*E*) Apoptosis monitored by FACS analysis. (*F*) Annexin V-FITC positive cells were quantified using FACS analysis. % Annexin V-FITC positive cells are plotted. (*G*) Telomerase activity as measured by the TRAP assay and plotted relative to the mismatch oligonucleotide. \*\* and \*\*\* represents  $p < 0.001$  and  $p < 0.0001$  respectively.

**Fig. S3. shRNA-mediated *p21* knockdown in unrelated human cancer cell lines sensitize them to telomerase inhibition-mediated apoptosis.** (A, B) Immunoblot analysis of RKO (A) and ACHN (B) cells stably transduced with non-specific control (NS) or two different *p21* shRNAs. (C) (Left) *p21* gene specific probes intensity values for the indicated cell lines were obtained from BioGPS, Relative *p21* expression is plotted. (Right) Immunoblot analysis to monitor *p21* expression levels in the indicated cell lines. Actin was used as a loading control. (D-F) Indicated cells were treated with mismatch oligonucleotide or with imetelstat for 6 weeks. (D) Cell viability was measured by trypan blue exclusion assay. Cell viability relative to mismatch oligonucleotide is plotted. (E) Annexin V-FITC positive cells were quantified for indicated cell lines using FACS analyses. % Annexin V positive cells under indicated conditions is plotted. (F) Telomerase activity as measured by the TRAP assay and plotted relative to the mismatch oligonucleotide. (G) Dot blot analysis of rolling circle amplification of C-circle DNA to measure ALT activity in the indicated cell lines. \*\* and \*\*\* represents  $p < 0.001$  and  $p < 0.0001$  respectively.

**Fig. S4. Loss of checkpoint proteins MDC1 or NBS1 do not cooperate with telomerase inhibition to induce growth arrest.** HCT116 cells stably transduced with *MDC1* (A-F) or *NBS1* (G-L) shRNAs. Where indicated, cells were treated either with mismatch oligonucleotide or imetelstat for 6 weeks. (A, G) qRT-PCR analysis of *MDC1* (A) or *NBS1* (G) mRNA. (B, H) Colony formation monitored by crystal violet staining. (C, I) Cell viability as measured by trypan blue exclusion assay. Cell viability relative to mismatch oligonucleotide is plotted. (D, J) Apoptosis monitored by FACS analysis. (E, K) Telomerase activity as measured by the TRAP

assay and plotted relative to the mismatch oligonucleotide. (F, L) qRT-PCR analysis of *PUMA* mRNA. \*\*\* represents  $p < 0.0001$ .

**Fig. S5. Loss of cyclin dependent kinase inhibitor p27 does not cooperate with telomerase inhibition to induce growth arrest.** HCT116 cells stably transduced with *p27* shRNAs and where indicated, cells were treated either with mismatch oligonucleotide or imetelstat for 6 weeks. (A) qRT-PCR analysis of *p27* mRNA. (B) Colony formation monitored by crystal violet staining. (C) Cell viability as measured by trypan blue exclusion assay. Cell viability relative to mismatch oligonucleotide is plotted. (D) Apoptosis monitored by FACS analysis of sub G1 population. (E) Telomerase activity as measured by the TRAP assay and plotted relative to the mismatch oligonucleotide. (F) qRT-PCR analysis of *PUMA* mRNA.

**Fig. S6. ER-stress inducer tunicamycin does not enhance tumor cell growth after Imetelstat treatment or loss of p21.** (A) Relative cell viability measured by trypan blue exclusion assay of HCT116 cells that were either remained untreated or treated with imetelstat, tunicamycin or both. (B) Apoptosis was measured by Annexin V-FITC staining for HCT116 cells that were either remained untreated or treated with imetelstat, tunicamycin or both. (C) Relative cell viability measured by trypan blue exclusion assay of HCT116 wild type or p21 KO cells that were either remained untreated or treated with tunicamycin. (D) Apoptosis was measured by Annexin V-FITC staining for HCT116 wild type or p21 KO cells that were either remained untreated or treated with tunicamycin.

**Fig. S7. *p21* does not regulate the ability of imetelstat to inhibit telomerase activity, telomere shortening or ALT.** Indicated cell lines were treated with mismatch oligonucleotide or imetelstat for 6 weeks. (A) Southern blot to measure telomere length. Size markers in kilobase are shown next to the gel image. (B) Telomere length relative to HCT116 cells treated with mismatch oligonucleotide, in all indicated cell lines corresponding to (A) is presented. (C) Telomere PNA-FISH to monitor signal-free chromosomal ends. (D) Signal-free chromosomal ends in (C) were quantified and plotted relative to mismatch oligonucleotide. (E) Dot blot analysis of rolling circle amplification of C-circle DNA to measure ALT activity in the indicated cell lines. \*\* represents  $p < 0.001$ .

**Fig. S8. Treatment of ALT activated cell line U2OS with imetelstat did not induce growth inhibition irrespective of p21 expression.** (A, B) U2OS cells expressing indicated shRNAs were treated with either a mismatch oligonucleotide or with Imetelstat for 6 weeks. (A) Colony formation was monitored by crystal violet staining. (B) cell viability was measured by trypan blue exclusion assay

**Fig. S9. *PUMA* activation is a general requirement for telomerase inhibition-induced tumor suppression.** (A, B) RKO cells with indicated shRNAs were treated with either a mismatch oligonucleotide or imetelstat for 6 weeks. (A) Fold change in *PUMA* transcript levels measured by qRT-PCR (B) Immunoblot analysis was performed for indicated proteins. (C) *PUMA* knockdown in *p21* shRNA expressing RKO cells was confirmed by qRT-PCR. (D-F) RKO cells with indicated shRNAs were treated with either a mismatch oligonucleotide or imetelstat for 6 weeks. (D) Relative cell viability was measured by trypan blue exclusion assay.



(E) Annexin V-FITC positive cells were quantified using FACS analysis. % Annexin V-FITC positive cells are plotted. (F) Relative telomerase activities of indicated cells. (G, H) ACHN cells with indicated shRNAs were treated with either a mismatch oligonucleotide or imetelstat for 6 weeks. (G) Fold change in *PUMA* transcript levels measured by qRT-PCR. (H) Immunoblot analysis was performed for indicated proteins. (I) *PUMA* knockdown in *p21* shRNA expressing ACHN cells was confirmed by qRT-PCR. (J-L) ACHN cells with indicated shRNAs were treated with either a mismatch oligonucleotide or imetelstat for 6 weeks. (J) Cell viability was measured by trypan blue exclusion assay. (K) Annexin V-FITC positive cells were quantified using FACS analysis. % Annexin V-FITC positive cells are plotted. (L) Relative telomerase activities of indicated cells. \*\* represents  $p < 0.001$ .

**Fig. S10. Analyses of telomerase activity by TRAP assay.** (A) Relative telomerase activities of HCT116 *p21*KO cells expressing indicated shRNAs and treated with a mismatch oligonucleotide (-) or with imetelstat (+). (B) Relative telomerase activities of HCT116 wild type and *p53*KO cells treated with a mismatch oligonucleotide (-) or with imetelstat (+).

**Fig. S11. Telomerase inhibition-induces strong tumor suppression in cancer cells with lower *p21* expression in a *PUMA* dependent manner.** (A) Indicated cell lines were treated with either a mismatch oligonucleotide or imetelstat for 6 weeks. Fold change in *PUMA* transcript levels measured by qRT-PCR. (B) *PUMA* knockdown in NCI H460 and OVCAR5 cells was confirmed by qRT-PCR. (C, D) Indicated cell lines were treated with either a mismatch oligonucleotide or imetelstat. (C) Cell viability was measured by trypan blue exclusion assay.

(D) Relative telomerase activities of indicated cells. \* and \*\* represents  $p < 0.01$  and  $p < 0.001$  respectively.

**Fig. S12. Nanoparticle-based systemic p21 siRNA delivery inhibits the growth of tumors in combination with imetelstat treatment.** (A) HCT116 cells were injected into the flanks of nude mice and were treated as indicated. Tumor volumes at indicated days are shown and the representative tumors are presented. (B) ACHN cells were injected into the flanks of nude mice and were treated as indicated. Tumor volumes at indicated days are shown and the representative tumors are presented. (C) Mouse derived HCT116 xenograft tumor under indicated treatment conditions were analyzed for indicated proteins by immunoblot analysis. (D) Mouse derived ACHN xenograft tumor under indicated treatment conditions were analyzed for indicated proteins by immunoblot analysis. (E) Mouse derived HCT116 xenograft tumor under indicated treatment conditions were analyzed for telomerase activity by TRAP assay. (F) Mouse derived ACHN xenograft tumor under indicated treatment conditions were analyzed for telomerase activity by TRAP assay. \*, \*\*, \*\*\* represents  $p < 0.01$ ,  $p < 0.001$ ,  $p < 0.0001$  respectively

**Fig. S13. Analyses of the drug toxicity of sorafenib, imetelstat and their combination in mice.** (A) Control mice group bearing HCT116 tumors or HCT116 tumor bearing mice treated with the indicated drugs were weighed at the end of the experiment. Average reduction in body weight in drug treatment group is plotted in comparison to control mice. (B) Activities of alanine aminotransferase (ALT), aspartate aminotransferase (AST) and alkaline phosphatase (AP) were analyzed in the sera of the indicated mice groups. Activities of these enzymes in comparison to the control mice group is plotted. (C) Relative hemacrite (packed red cell volume) level in

HCT116 tumor bearing mice, compared to vehicle control. (D) Relative Red Blood cell (RBC) count in HCT116 tumor bearing mice under indicated condition, compared to vehicle control. (E) Relative White blood cell (WBC) count in HCT116 tumor bearing mice under indicated condition, compared to vehicle control. (F) Activity of creatinine in the sera of the indicated mice groups. Activities in comparison to the control mice group is plotted.

**Fig. S14. Simultaneous inhibition of telomerase and p21 cause synergistic tumor suppression in a wide variety of cancer cells.** (A-E) Average tumor volumes from mice treated with vehicle, sorafenib alone, imetelstat alone or with both drugs for indicated cell lines. \*\*\* represents  $p < 0.0001$ .

**Fig. S15. Analyses of the drug toxicity of UC2288, imetelstat and their combination in mice.** (A) Control mice group bearing HCT116 tumors or HCT116 tumor bearing mice treated with the indicated drugs were weighed at the end of the experiment. Average reduction in body weight in drug treatment group is plotted in comparison to control mice. (B) Activities of alanine aminotransferase (ALT), aspartate aminotransferase (AST) and alkaline phosphatase (AP) were analyzed in the sera of the indicated mice groups. Activities of these enzymes in comparison to the control mice group is plotted. (C) Relative hemacrite (packed red cell volume) level in HCT116 tumor bearing mice, compared to vehicle control. (D) Relative Red Blood cell (RBC) count in HCT116 tumor bearing mice under indicated condition, compared to vehicle control. (E) Relative White blood cell (WBC) count in HCT116 tumor bearing mice under indicated condition, compared to vehicle control. (F) Activity of creatinine in the sera of the indicated mice groups. Activities in comparison to the control mice group, is plotted.

**Fig. S16. Telomerase activity measurement.** DLD1 (**Left**) and A375.S2 (**Right**) cells treated as indicated were analyzed for telomerase activity. Relative telomerase activity is plotted.



Fig. S1

A HCT116 p21KO cells

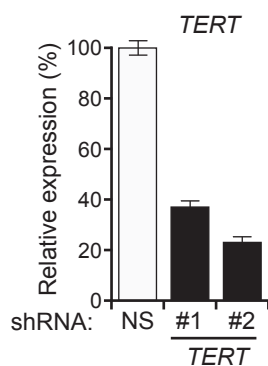

B

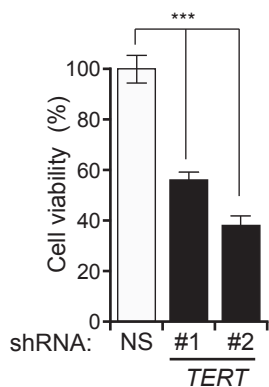

C

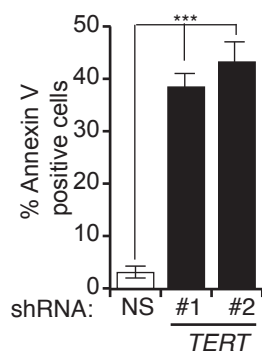

D

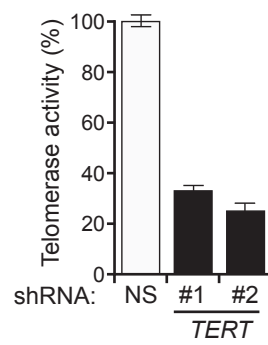

E HCT116 cells

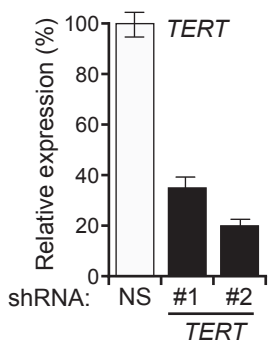

F

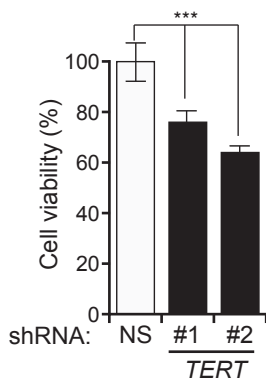

G

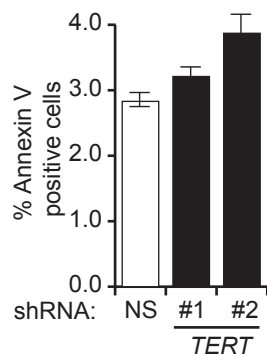

H

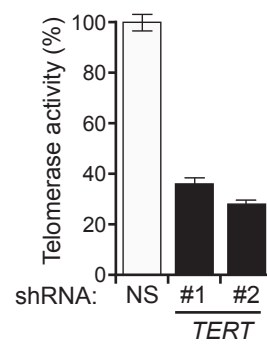

**Fig. S2**

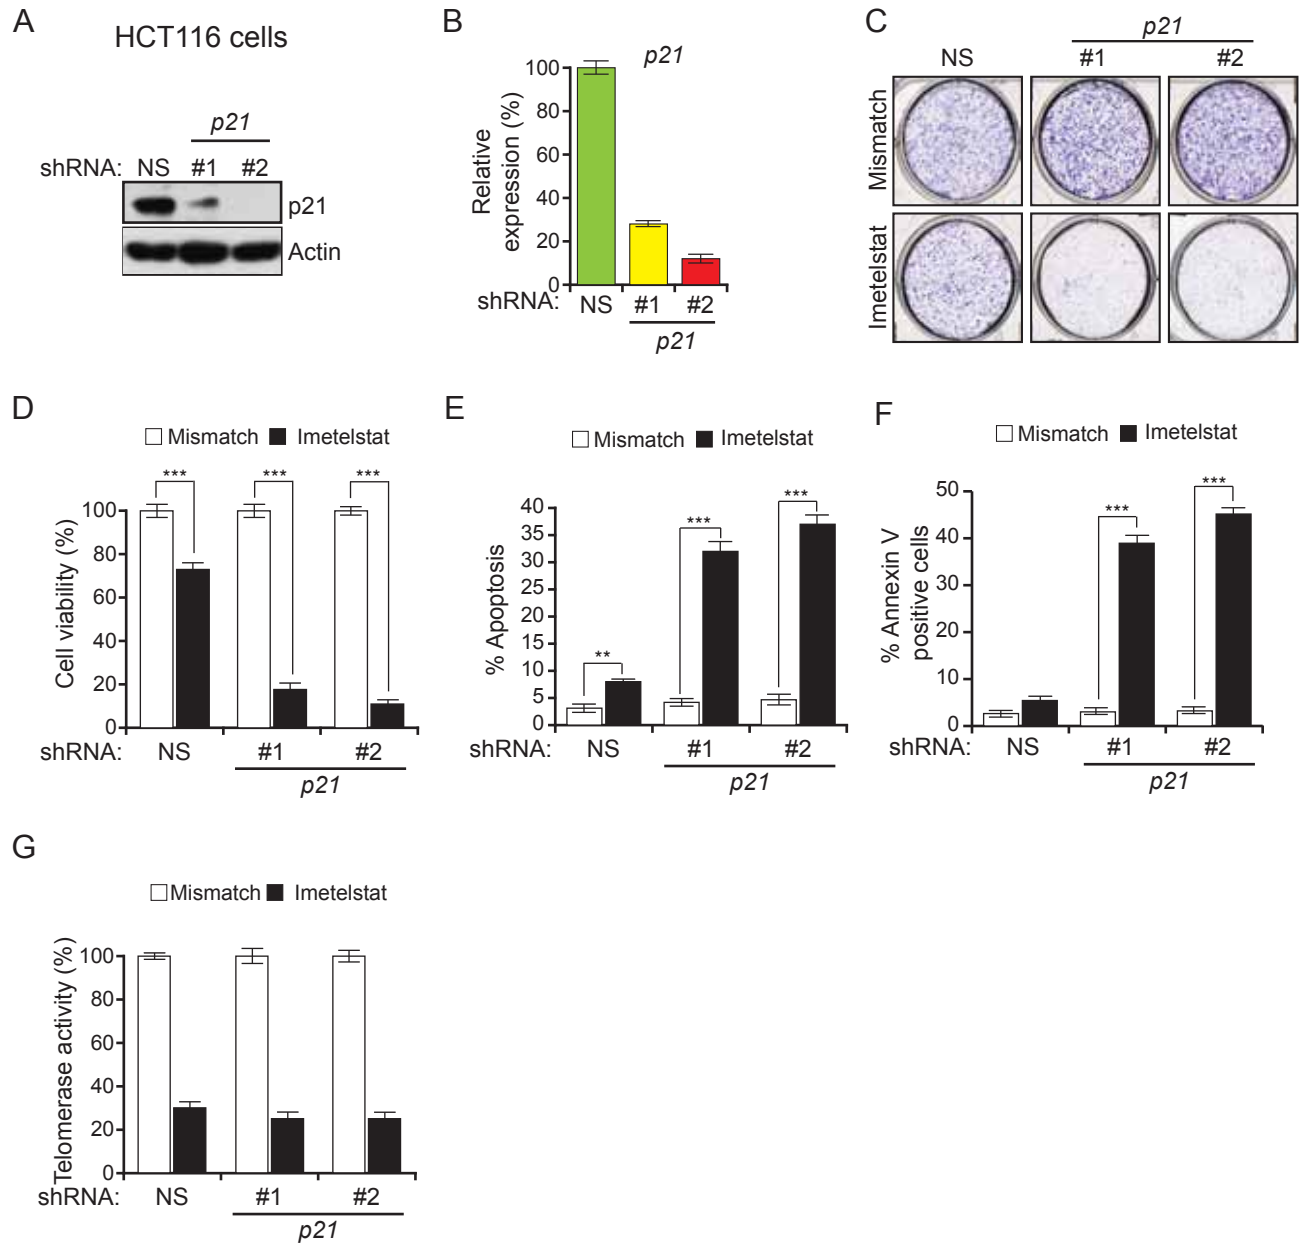

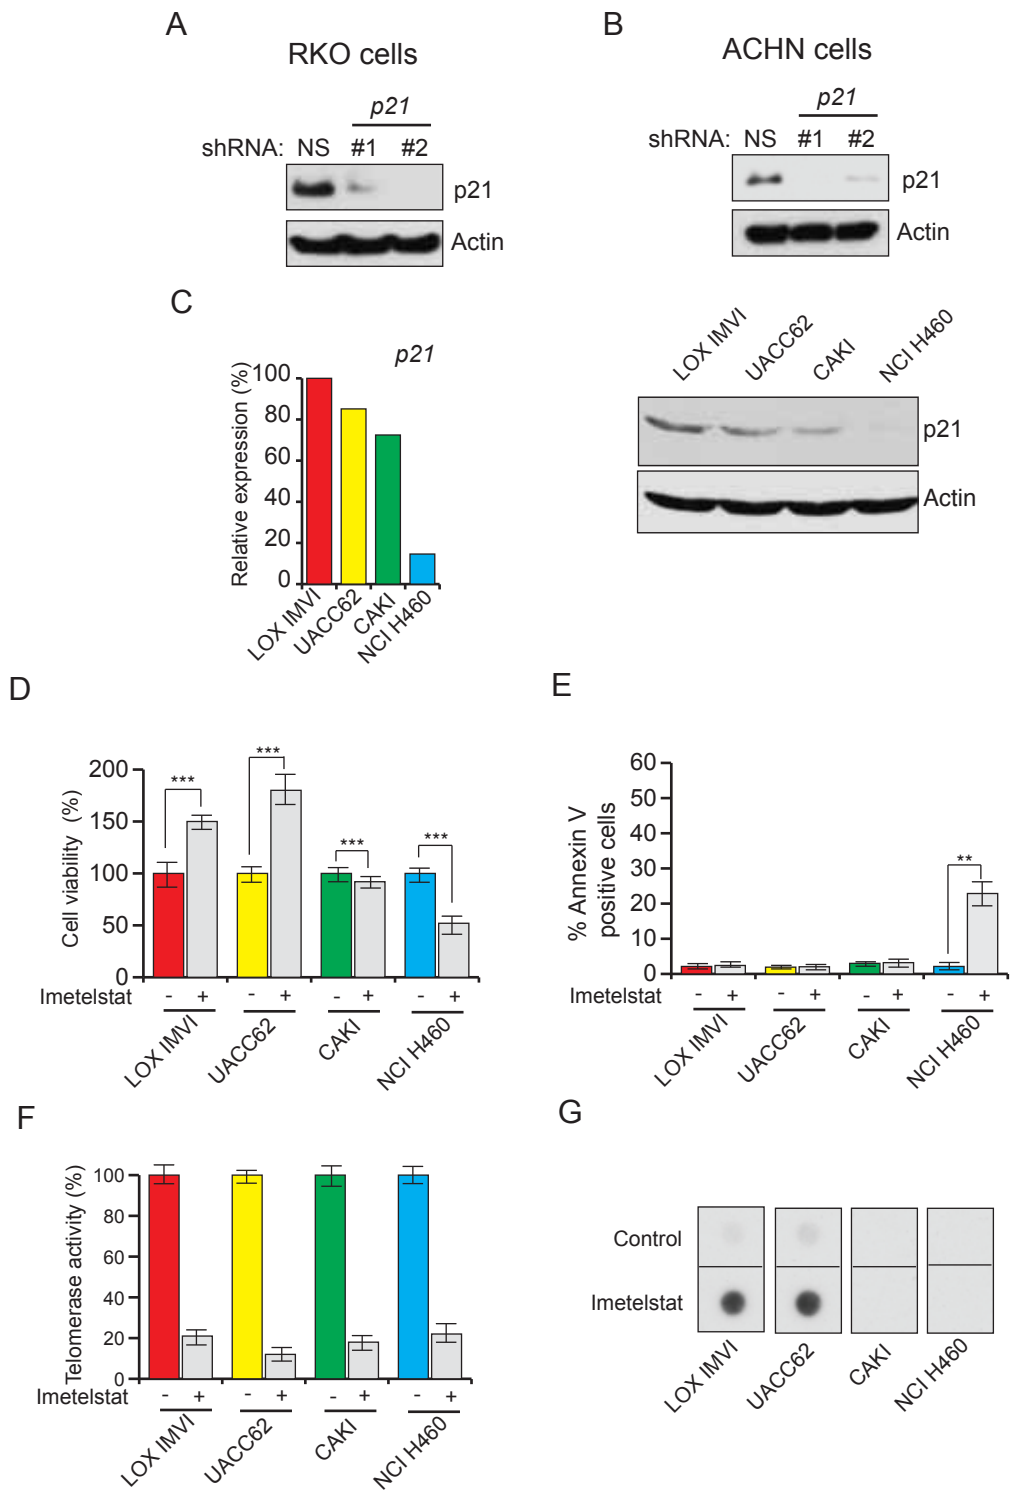



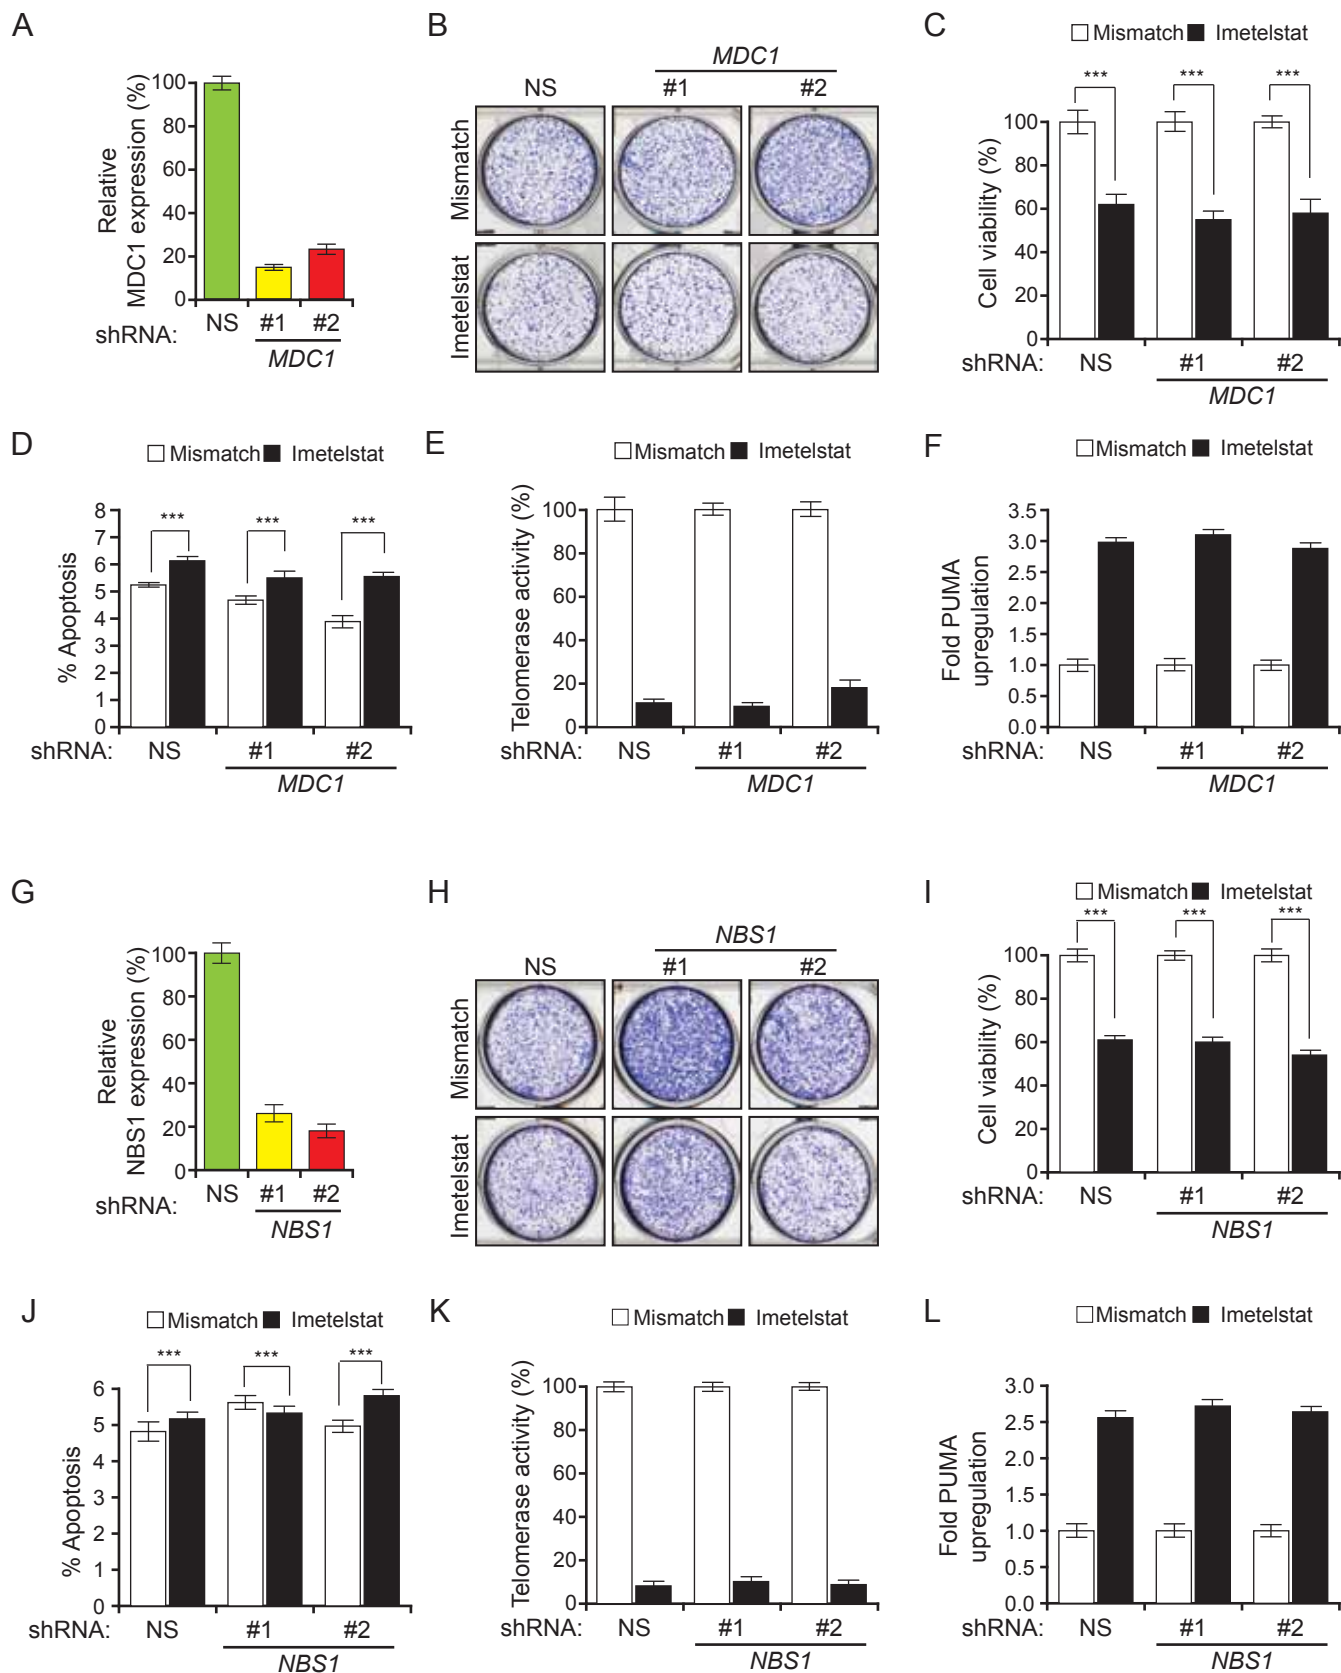

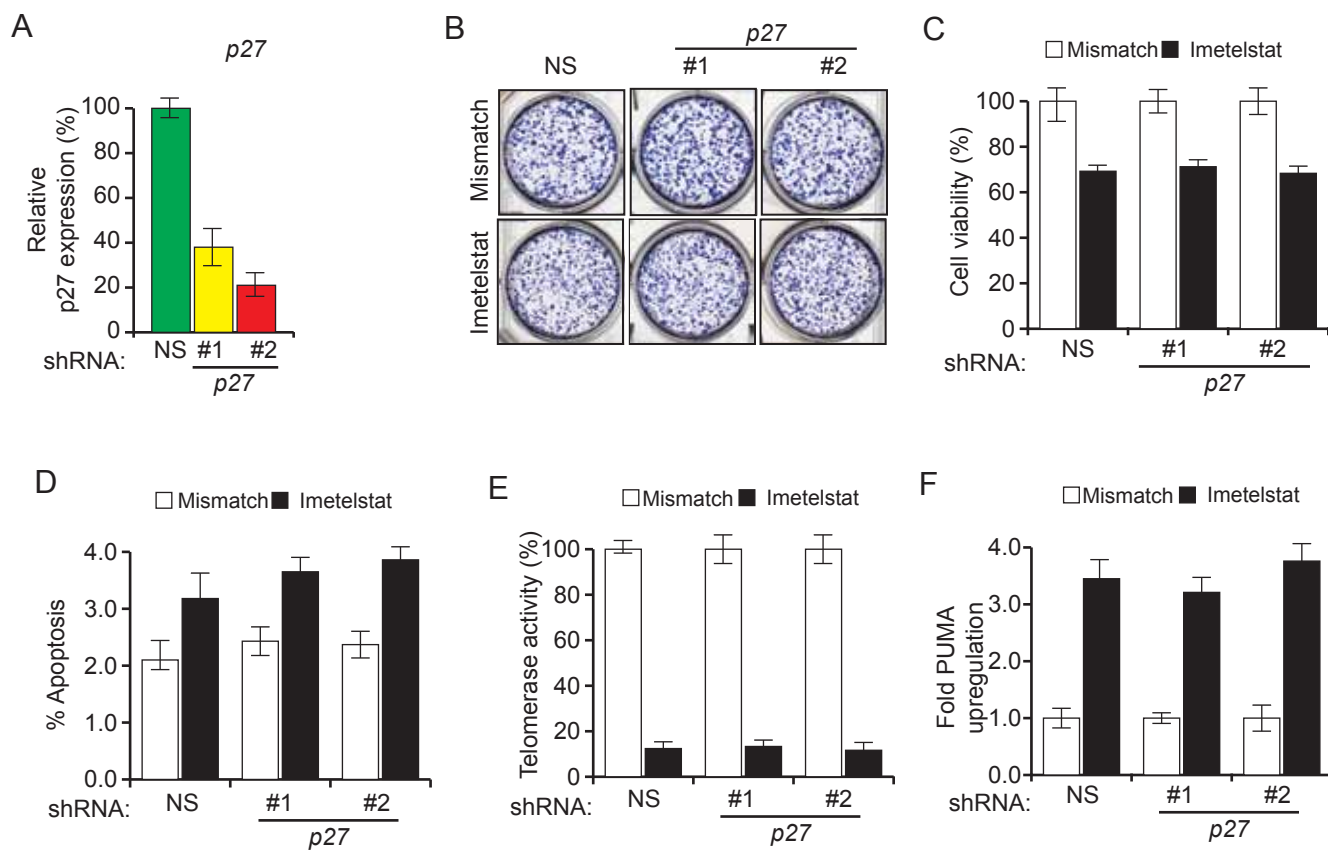

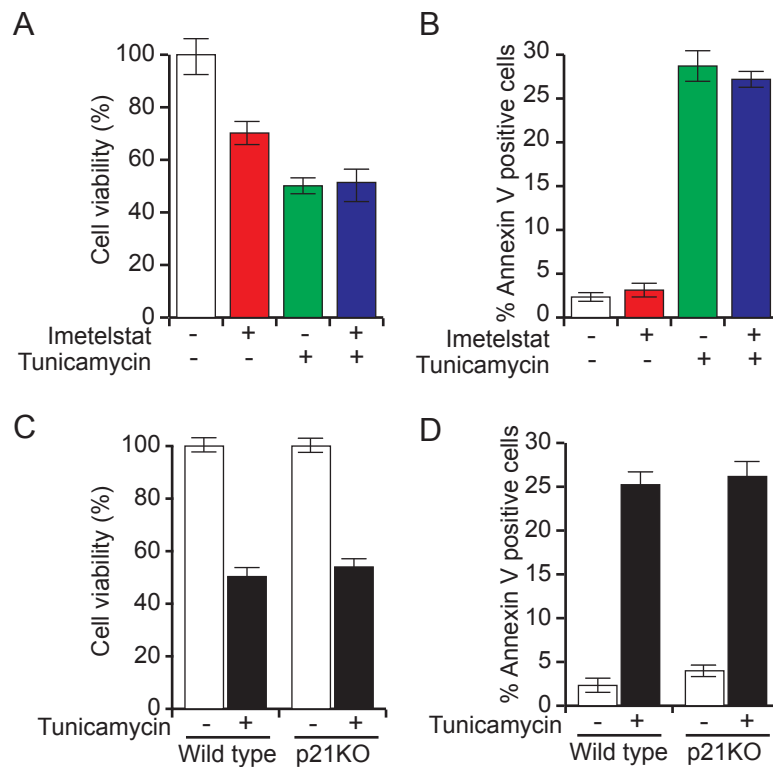

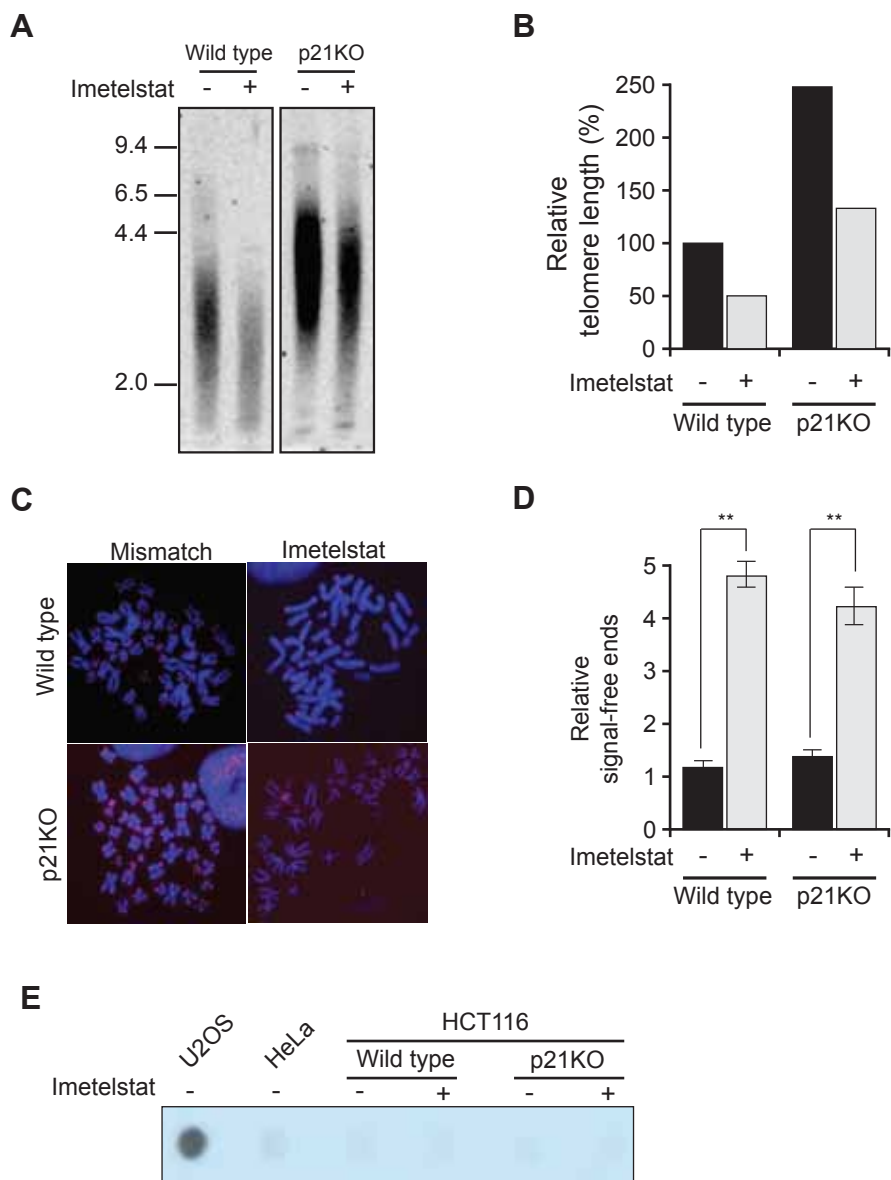

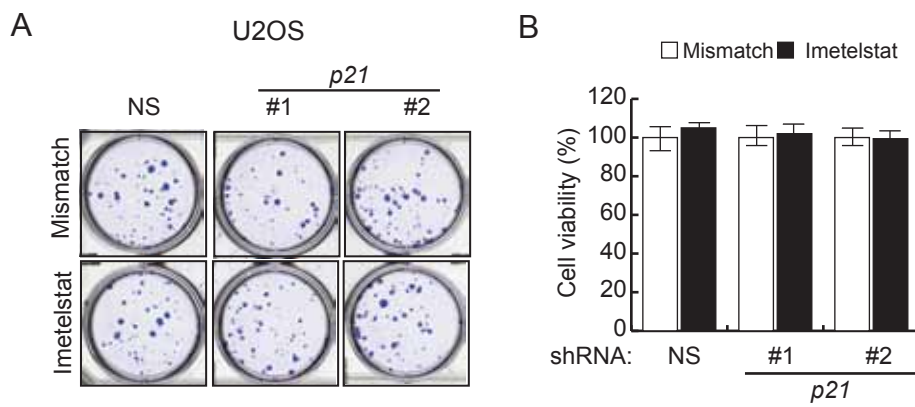

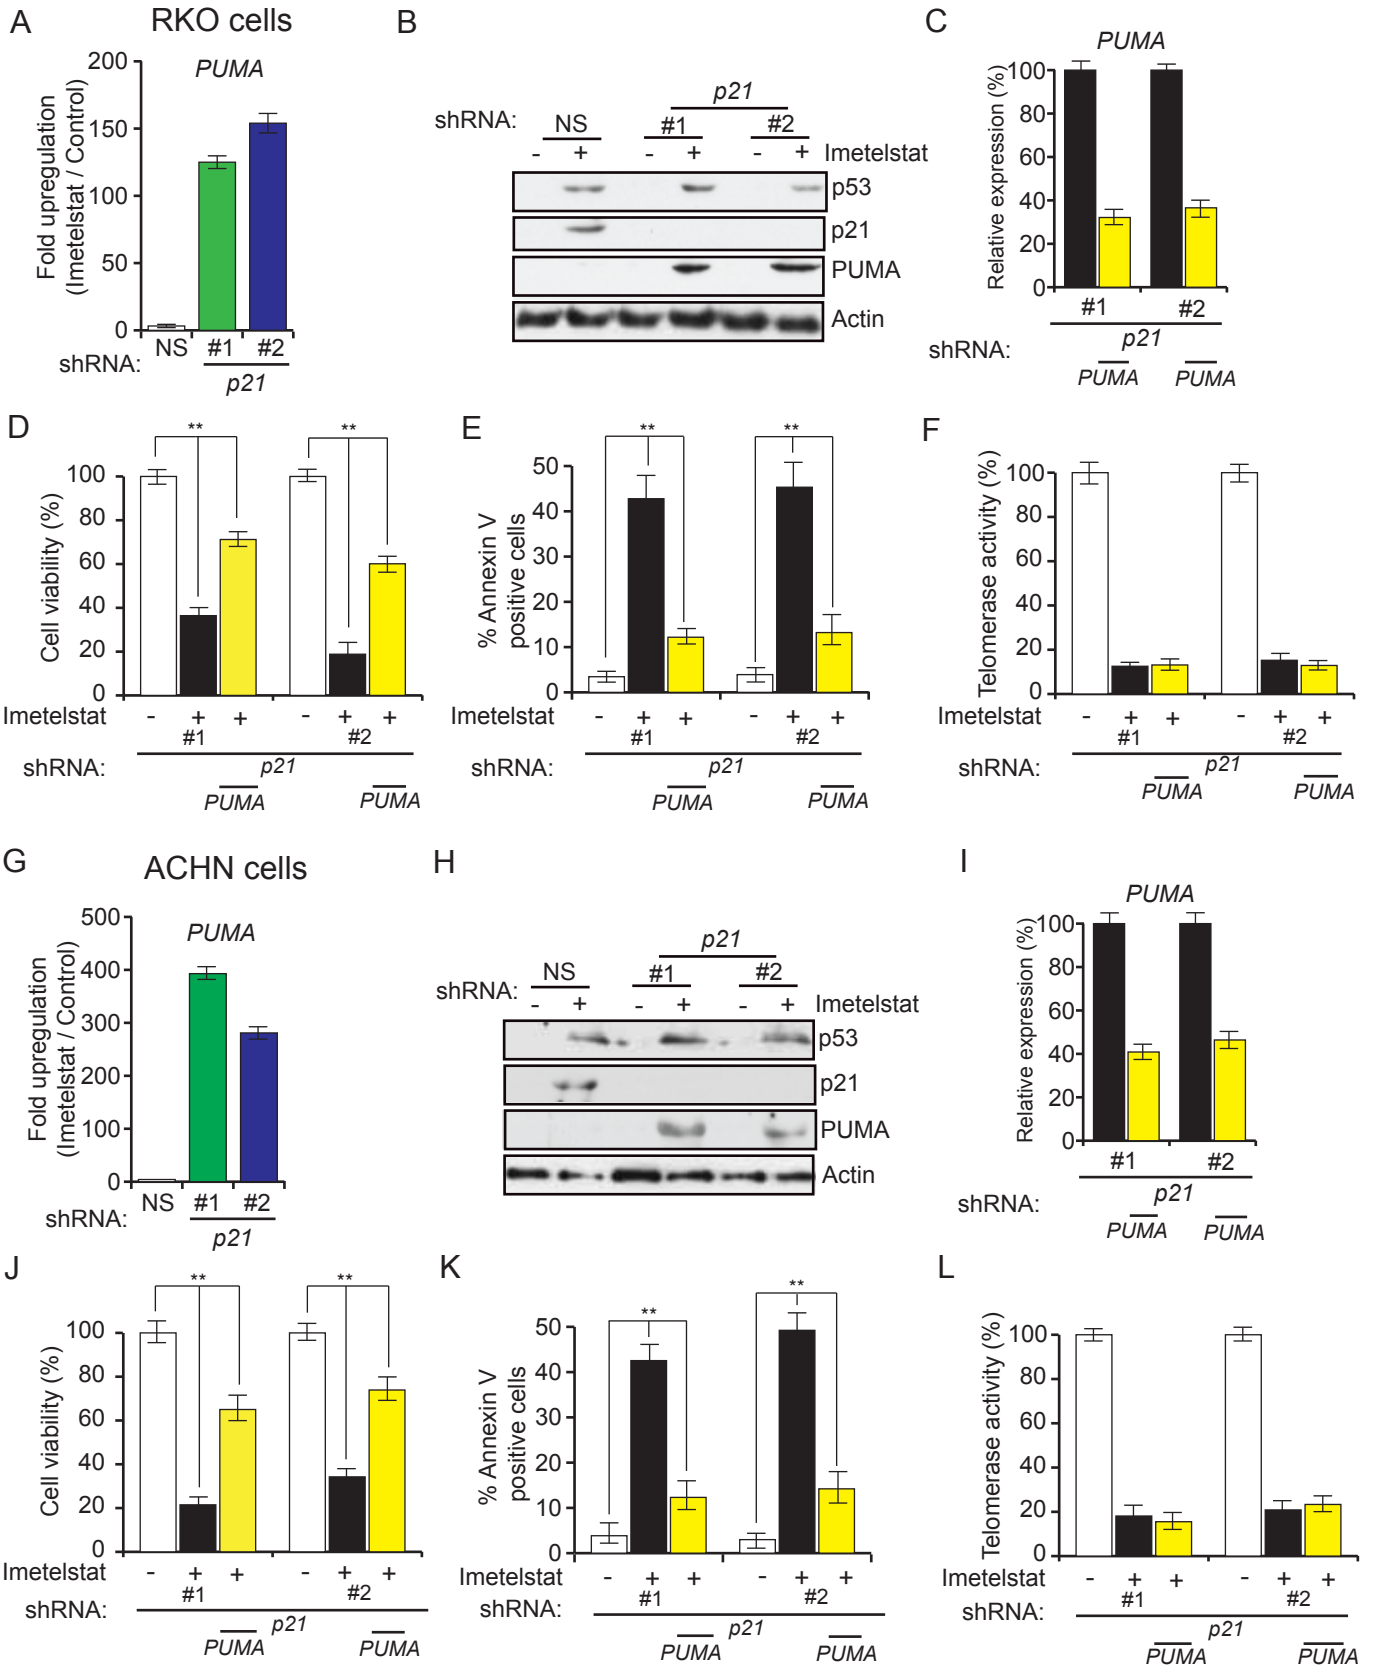

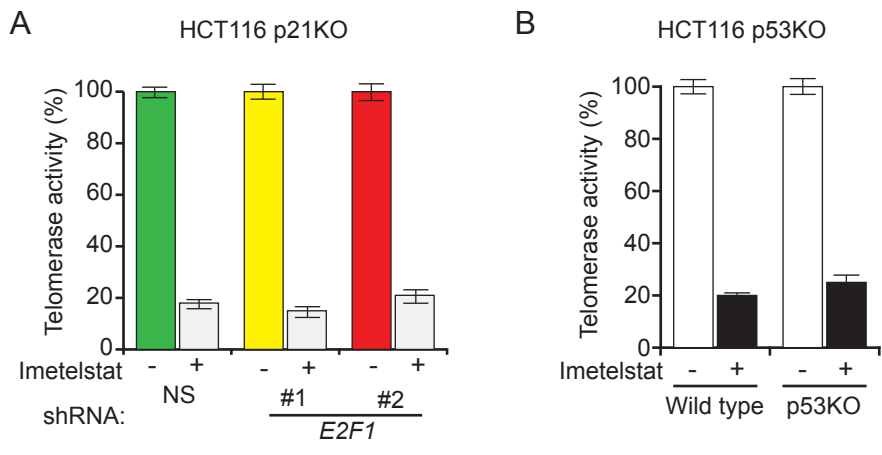

A

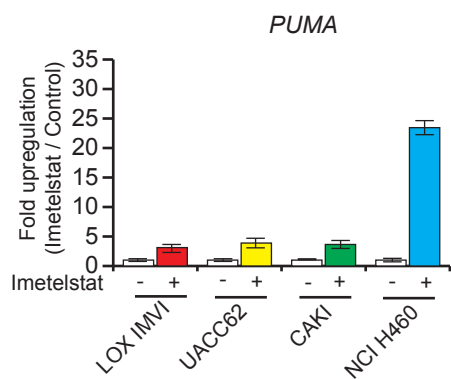

B

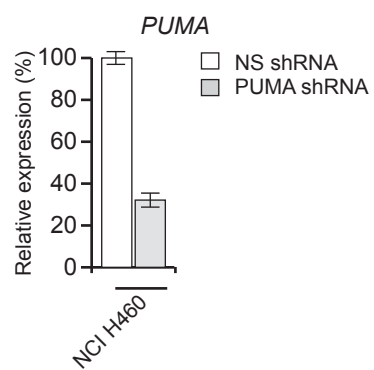

C

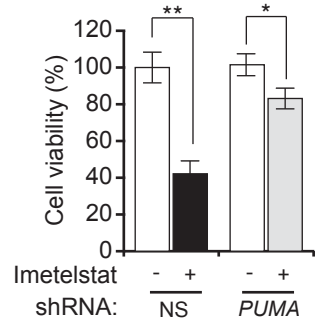

D

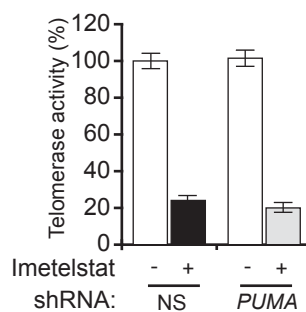



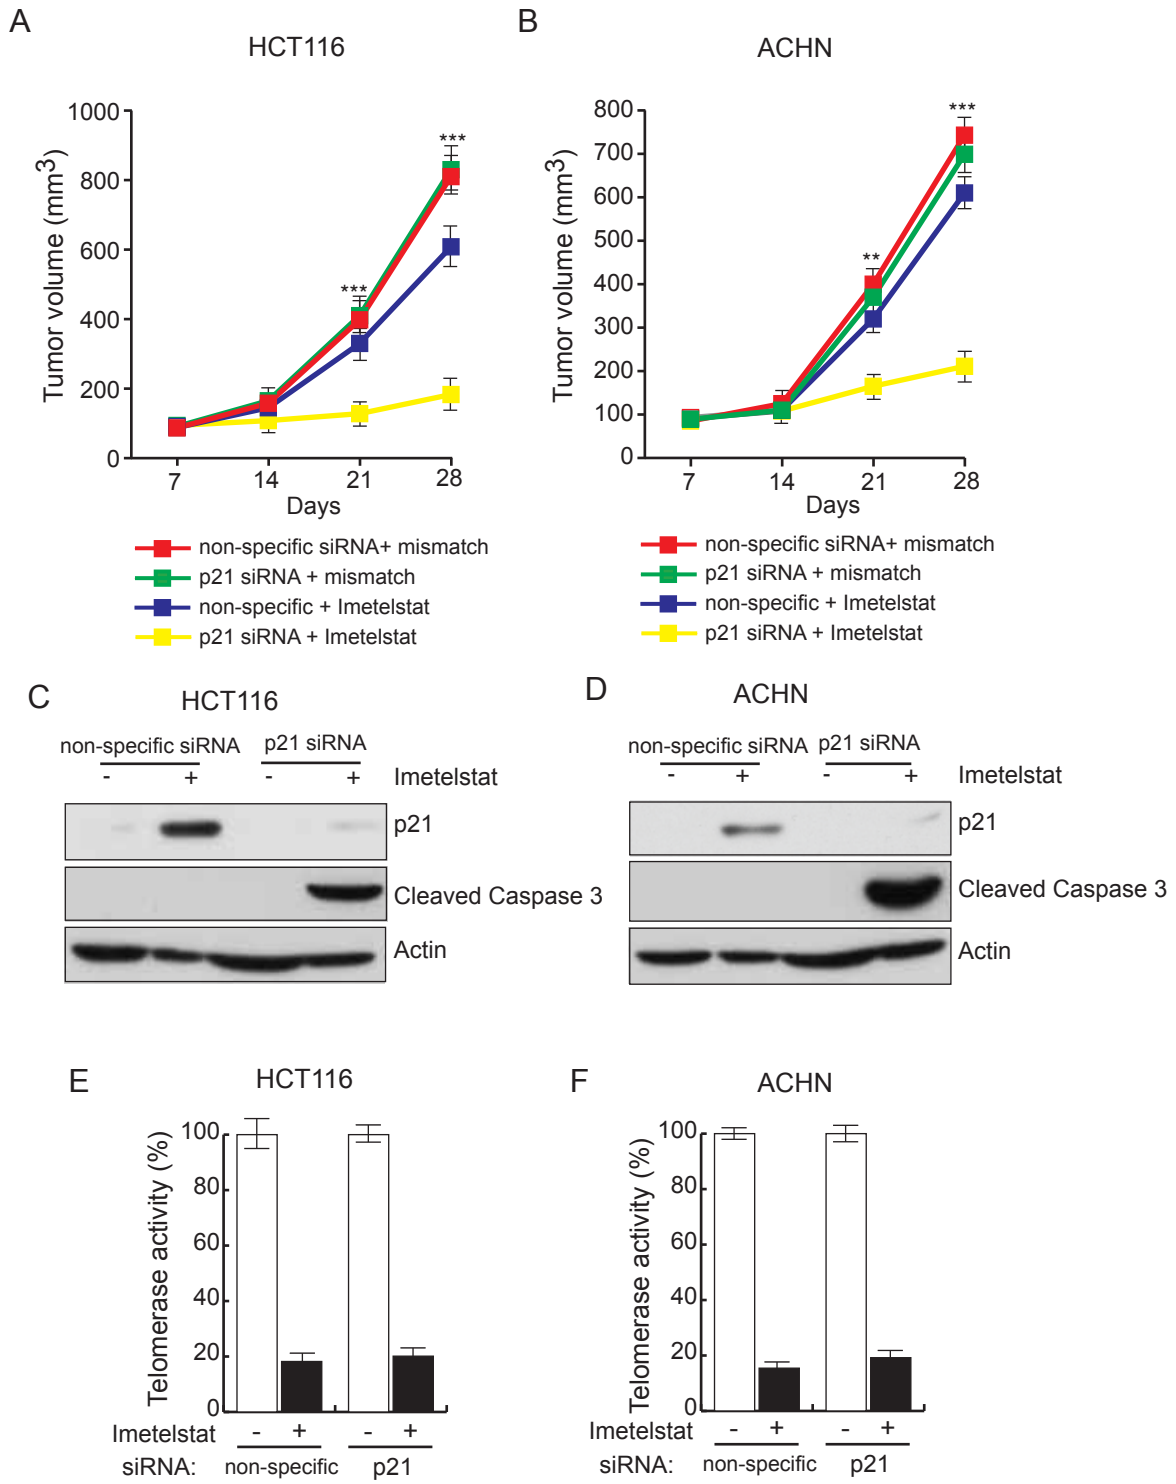

Fig. S13

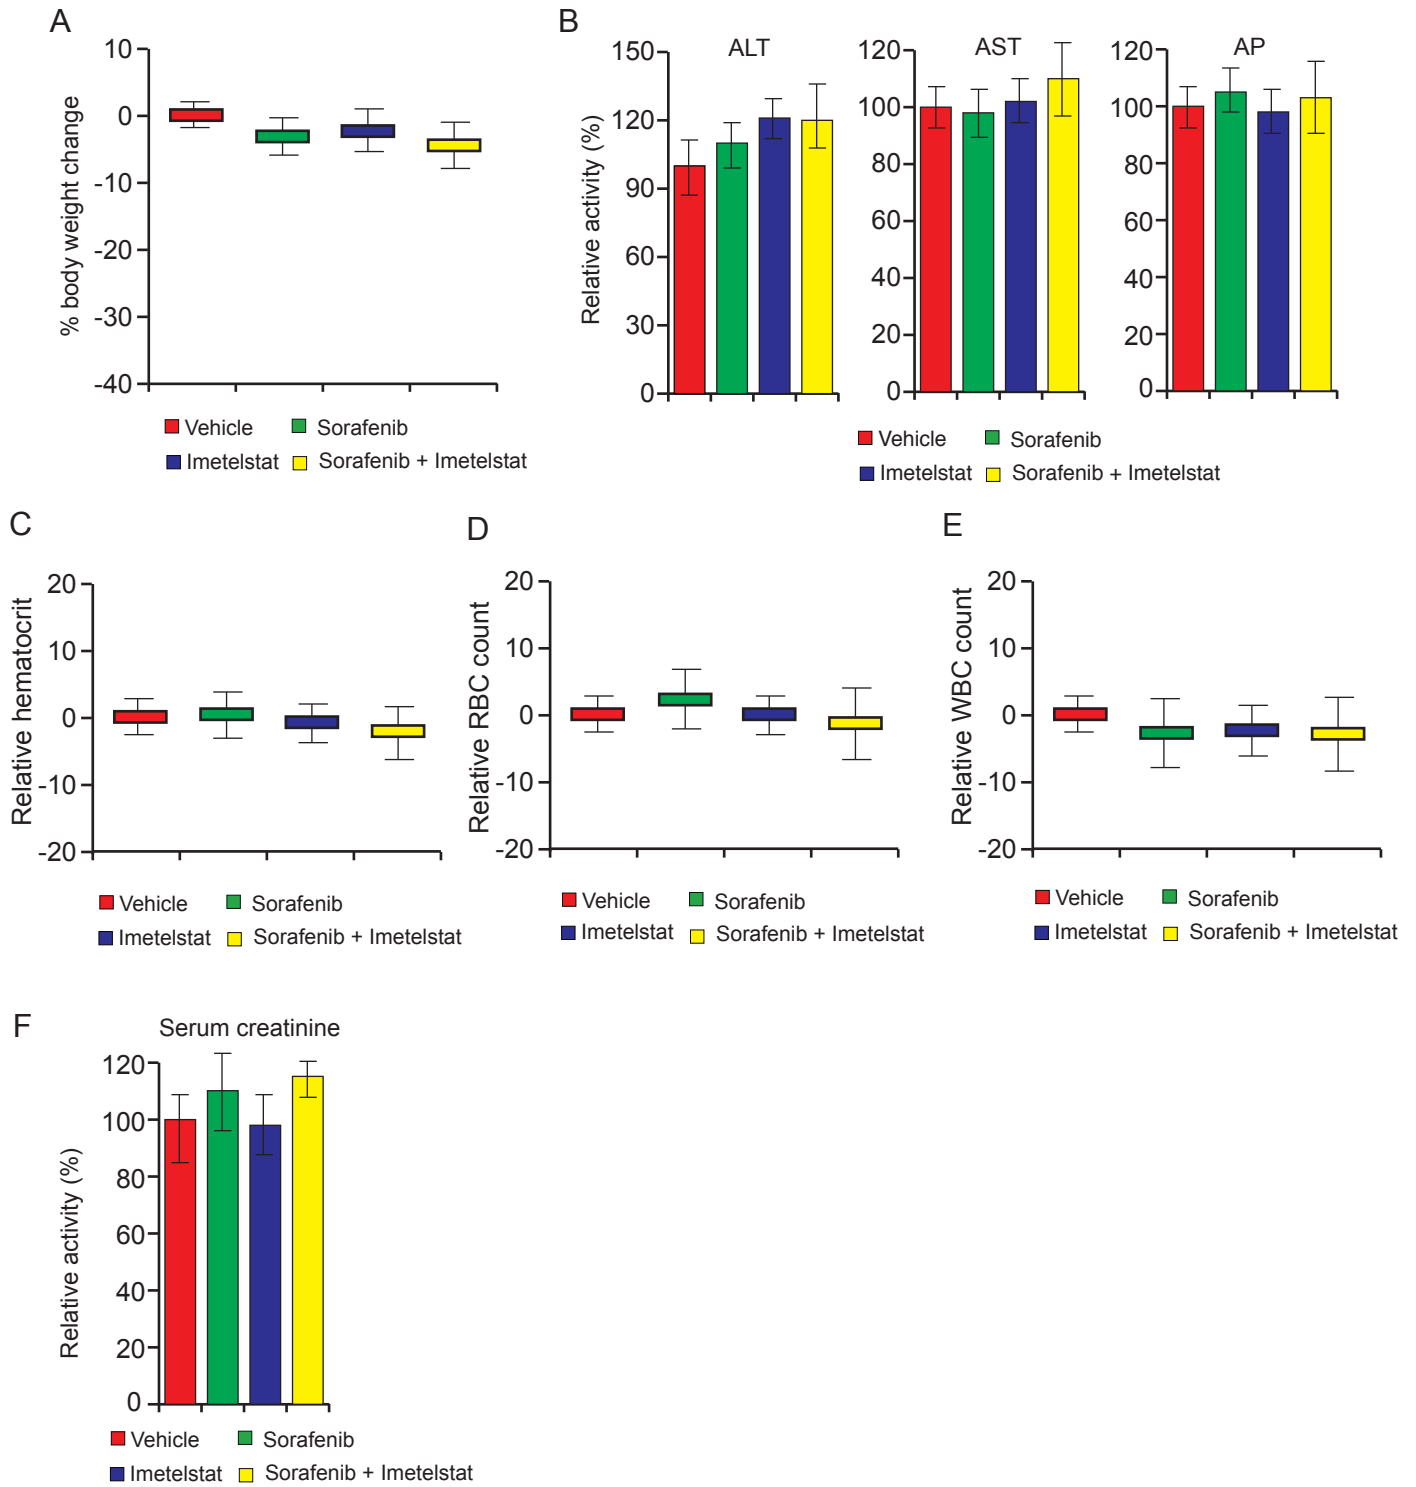

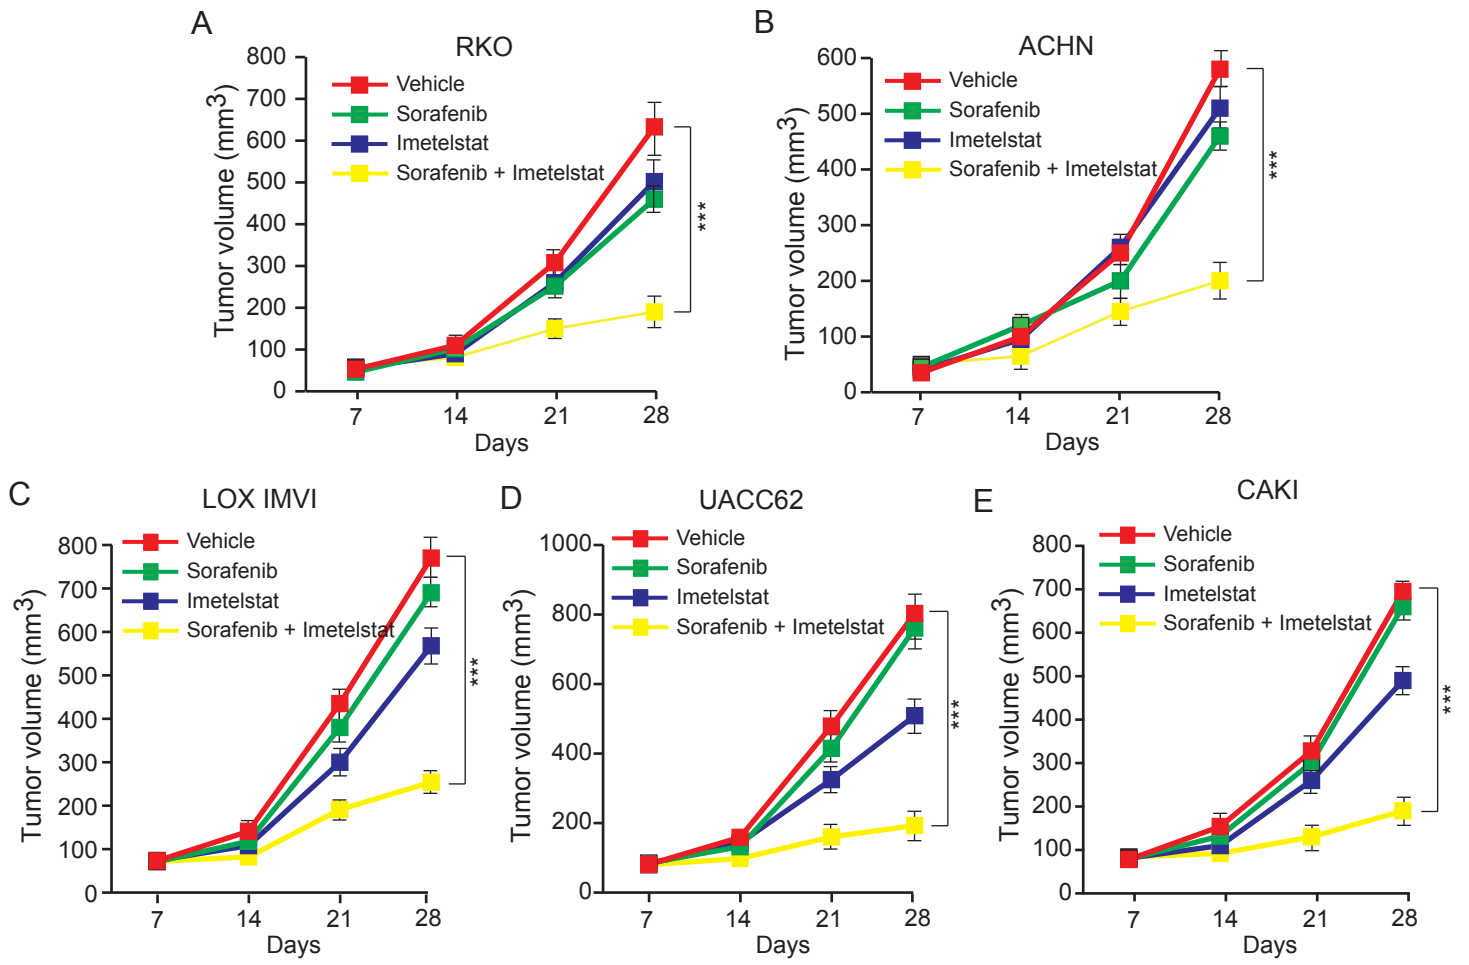

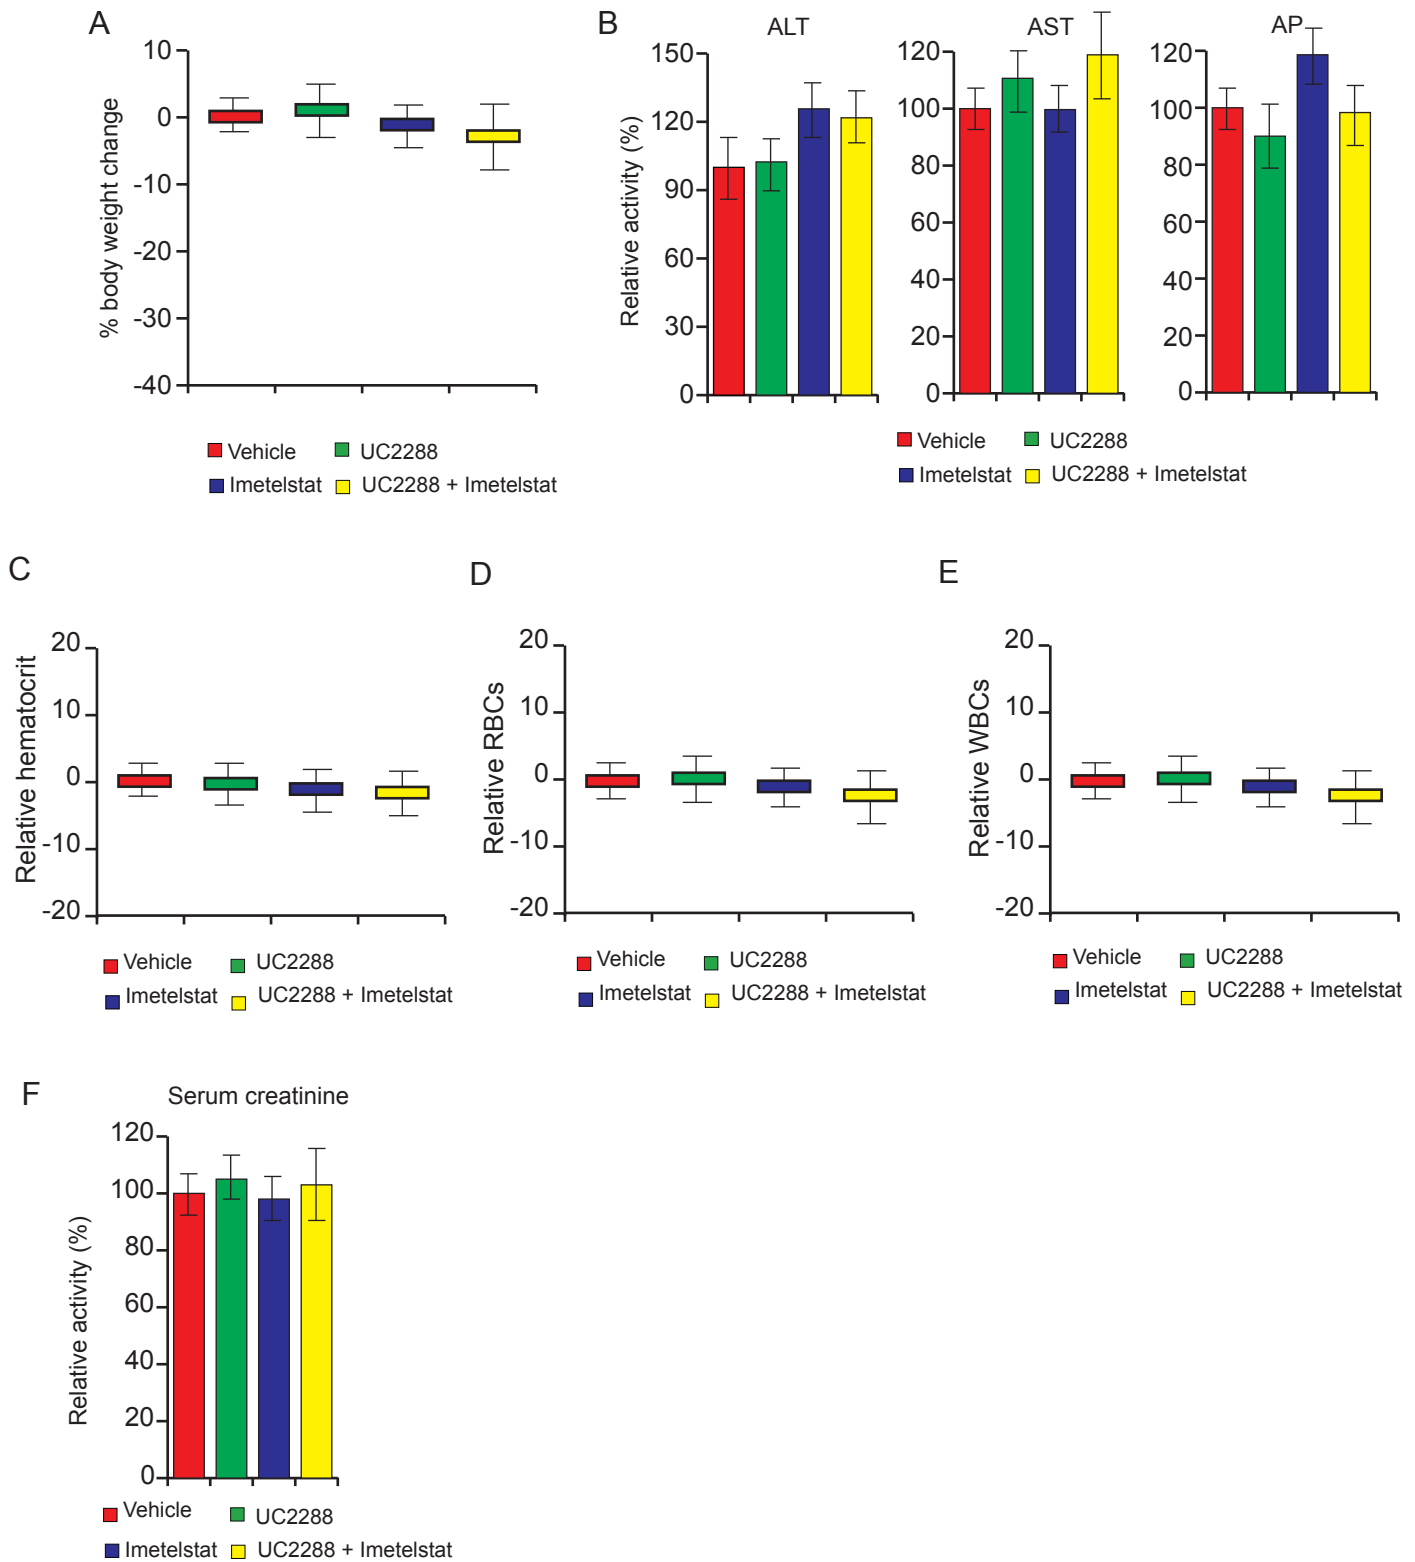

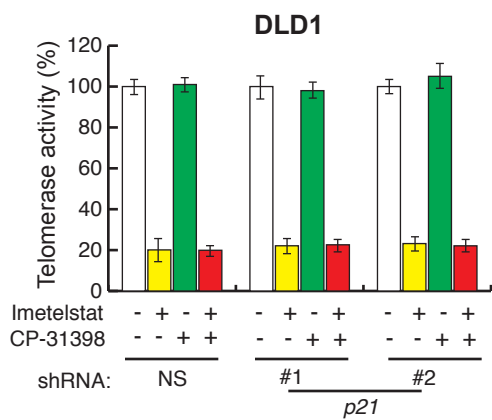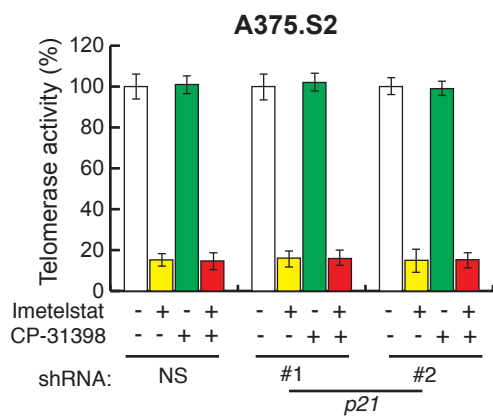

Supplement: 1411370111_pnas.1411370111.sapp.pdf [file 1411370111_pnas.1411370111.sapp.pdf]
